# Supplementary material for: New insight into the molecular mechanism of colour differentiation among floral segments in orchids
Source: PubMed Central journal article supplement (PMC7048853; doi:10.1038/s42003-020-0821-8), 2020-02-28
Supplement: 42003_2020_821_MOESM1_ESM.pdf [file 42003_2020_821_MOESM1_ESM.pdf]

**a**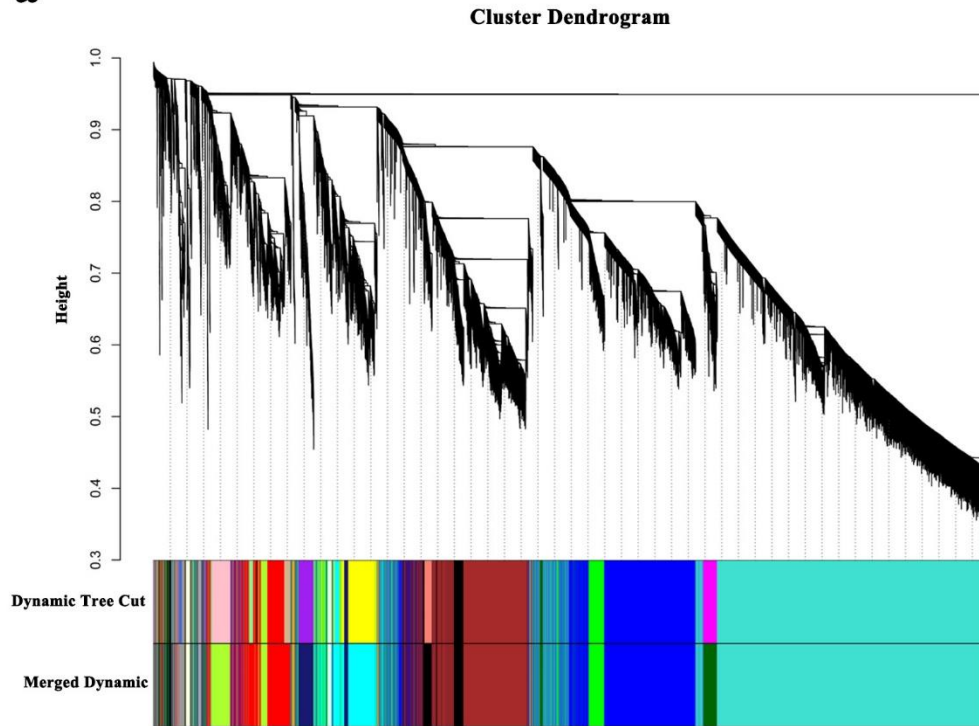**b**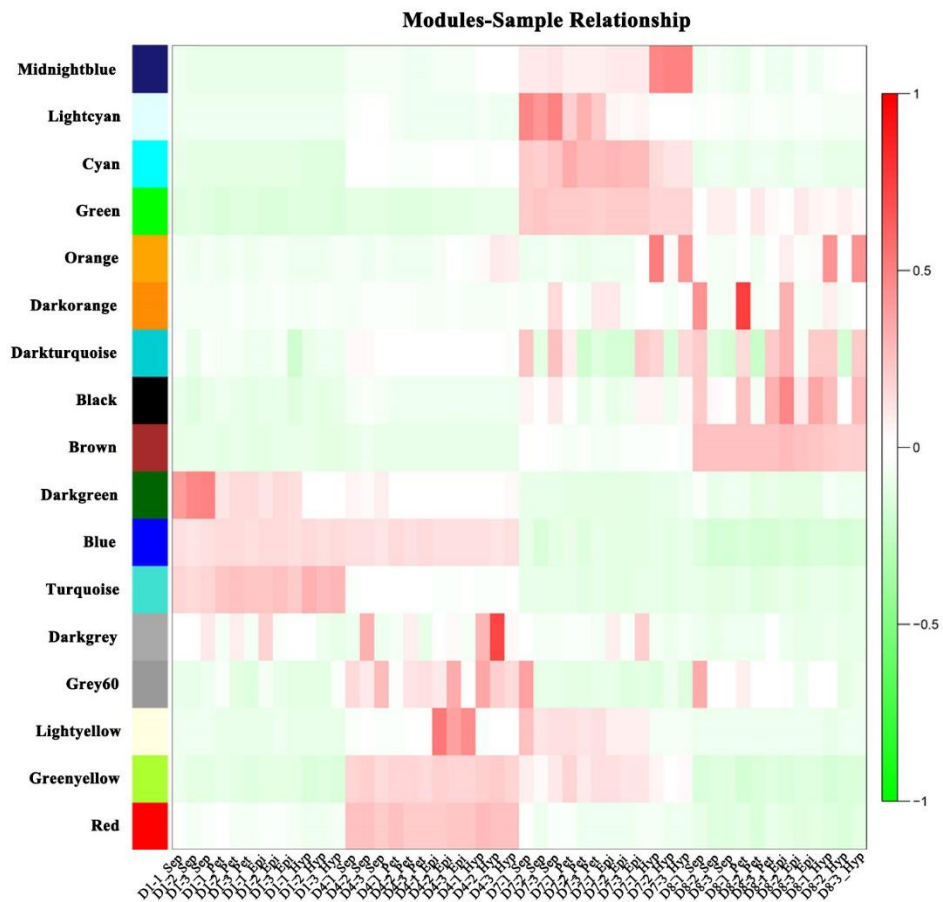

Supplemental Figure 1. Weighted gene co-expression network analysis (WGCNA)

**in the sepals/petals and lip segments during KOVA flower development. a,** Hierarchical clustering tree of isoforms/unigenes based on their expression level in 48 transcriptomes. Each branch represents an isoform or unigene, and each colour below represents a module. The dynamic tree cut shows that the isoforms/unigenes fell into different modules. The merged dynamic indicates that the modules were divided by clustering modules with similar expression patterns. **b,** The heatmap analysis displays the module expression pattern in the 48 samples. Sepal, petal, epichile, and hypochile are abbreviated Sep, Pet, Epi, and Hyp, respectively. Each Sep, Pet, Epi, and Hyp in the four stages were sampled with three biological replicates.

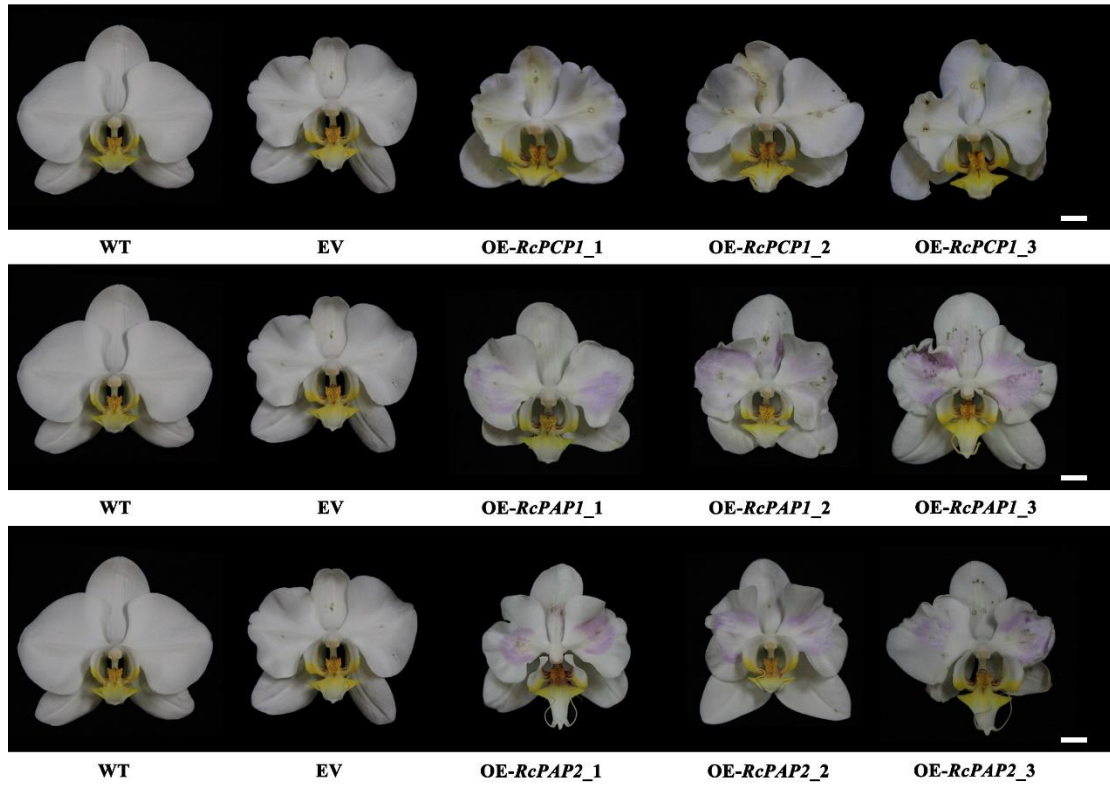

**Supplemental Figure 2.** The transient overexpression essays of *RcPCP1*, *RcPAP1* and *RcPAP2*. To ensure the reliability of the results, the phenotype of the transient overexpression assay of each isoform/unigene was independently repeated three times

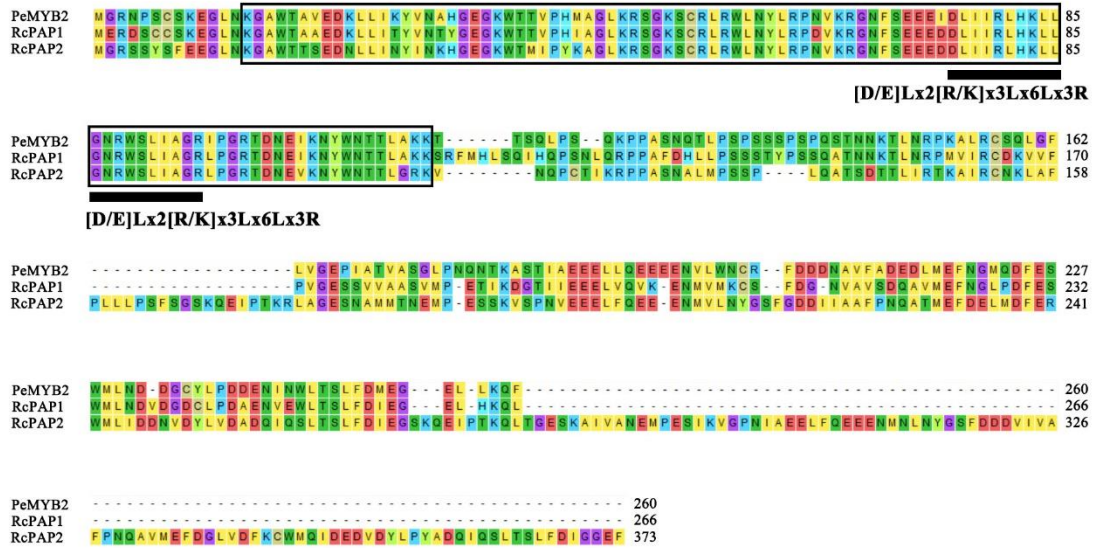

**Supplemental Figure 3. Alignment of the amino acid sequence of RcPAP1, RcPAP2 and PeMYB2.** These three MYBs have their own specific amino acid sequence, especially in positions from 200 to 372 bp. The DNA-binding domain of R2R3 MYB is labeled by the black box and the motif ([D/E]Lx2[R/K]x3Lx6Lx3R) that interacts with a bHLH transcription factor in *Arabidopsis*<sup>1</sup> is indicated by a black bar below the alignment.

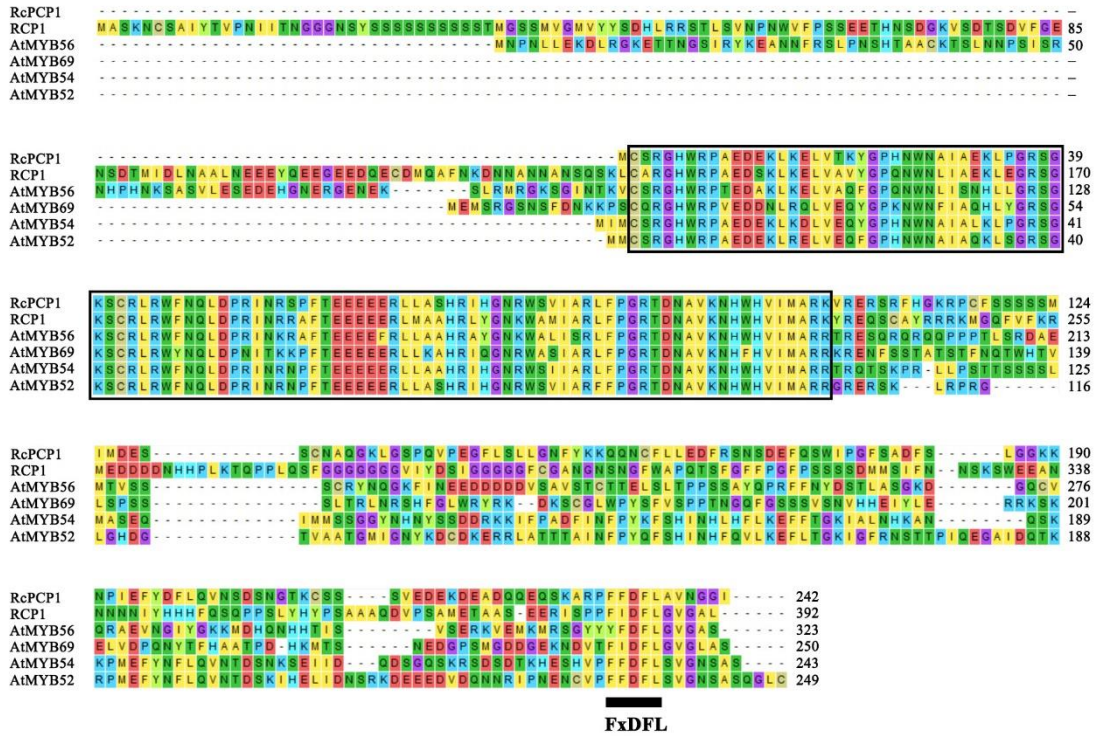

**Supplemental Figure 4. Alignment of the amino acid sequence of RcPCP1, RCP1 and the closely related homologs in *Arabidopsis thaliana*.** The DNA-binding domain of R2R3 MYB is labeled by the black box and the signature motif (FxDFL) that defines the Subgroup 21 R2R3 MYB clade<sup>2</sup> is indicated by a black bar below the alignment.

**Supplementary Table 1. Primers used in this study.**

| For qRT-PCR |                         |
|-------------|-------------------------|
| Primer name | Sequence (5'-3')        |
| 18S_F       | AAGCTCGCAAGTACACGACT    |
| 18S_R       | TCCAATGGTGCTCGTTCTCA    |
| RcPAP1_F    | ACGTGGAAACTTCTCCGAGG    |
| RcPAP1_R    | AGATAGATGCATGAAGCGCGA   |
| RcPAP2_F    | ATGGCTGAACTACCTGAGGC    |
| RcPAP2_R    | TGGTGCATGGTTGATTCACCT   |
| RcPCP1_F    | ACGCAATCGCTGAGAAGCTC    |
| RcPCP1_R    | CTTCACAGCGTTATCTGTGCG   |
| BCH1_F      | TAAGAGTGGCGCAGTGATCG    |
| BCH1_R      | CTGGACATTATCGCCGCAAC    |
| AP3-1_F     | GAGCTCACTGTTCTCTGCGA    |
| AP3-1_R     | GAGATGCTTCAGTGTATGCTGC  |
| AP3-2_F     | CCTACCGCTGACACCAAGAG    |
| AP3-2_R     | CTCAAGACCACGCAGTTCCT    |
| AP3-3_F     | GCCGGCAAGTAACGTACTIONCA |
| AP3-3_R     | ATGCCGGTGACTTGCTGATA    |
| AP3-4_F     | CTCTCAAGAAGCACACCGGA    |
| AP3-4_R     | AGATCATGCGAGCCGTATCC    |
| AGL6-1_F    | CCTTCTCCAAGCGCAGGAAT    |
| AGL6-1_R    | ACTCATAGAGCTTGCCTCGG    |
| AGL6-2_F    | TTGGAACAGACGGTGGATCG    |
| AGL6-2_R    | CCAACTCCACCATTCTCTCGG   |
| PeActin_4_F | TTGTGAGCAACTGGGATGACAT  |
| PeActin_4_R | GCCACGCGAAGTTCATTGT     |
| PePSY_F     | CGGAGAGGAGACGAGCAATC    |
| PePSY_R     | GCTGGATGTCGACAGGGTAG    |

|            |                            |
|------------|----------------------------|
| PePDS_F    | AGTGGATGAAACGGCAGGG        |
| PePDS_R    | TGCATAGCCTCTCAGGAGGA       |
| PeZ-ISO_F  | GTGAGAAGCTCATTGGCGAG       |
| PeZ-ISO_R  | CCACACAAGCTCATGAACCC       |
| PeZDS_F    | GTCCCGTTGTTTCGAGCTCTT      |
| PeZDS_R    | GCAAGAGAGAAGCCTCGGTT       |
| PeCRTISO_F | CATGTCTGGTGCTGCAATGG       |
| PeCRTISO_R | CCAGCGAGTCAAGGATCTCA       |
| PeLCYE_F   | TCGCTTGCCTGATTGGATGT       |
| PeLCYE_R   | AAGCCAGACGGATCAGCAA        |
| PeLCYB_F   | CGCCTTCGTCTACATCGACA       |
| PeLCYB_R   | GTGGACGACGTTGAGGACTT       |
| PeBCH1_F   | GATTTGTTGGCGATGCGGAG       |
| PeBCH1_R   | TCCGTCAATGGAACCTCGCT       |
| PeCHS_F    | ACTGCGAGCATCTCACTGAC       |
| PeCHS_R    | GACCTCGGCGACAACCTATGT      |
| PeCHI_F    | TCGGAGTGTACTTGGAAGCG       |
| PeCHI_R    | CCGTTAATGGCAGCAGCATC       |
| PeF3H_F    | TGGAGATGGAGGTCGAAGGT       |
| PeF3H_R    | CGGCAGCAGATCGAAGAACT       |
| PeF3'H_F   | CGGAACCTGGACTACCATCG       |
| PeF3'H_R   | AATTACGGAATGACGGCGGA       |
| PeF3'5'H_F | TCATTACCTGAGCAACGGTCGG     |
| PeF3'5'H_R | AACGCCGCGATCGAAAGCC        |
| PeDFR_F    | AGGATATGTTTGATGATGCTATTAAG |
| PeDFR_R    | TTCCTCAGTGTTGGGCGGTAAGAG   |
| PeANS_F    | TGCCACAGCGTTCTTCACCG       |
| PeANS_R    | AAACCGCCCACGAGATCCGTAC     |

---

For Isoform/Unigene CDS clone

---

---

|              |                                 |
|--------------|---------------------------------|
| RcPAP1_CDS_F | CCCTCGAGGGATGGAAAGGGATTCATGTTGT |
| RcPAP1_CDS_R | CCCTCGAGGGTTATAATTGCTTATGCAGCTC |
| RcPAP2_CDS_F | CCCTCGAGGGATGGGAAGGAGTTCTTACTCT |
| RcPAP2_CDS_R | CCCTCGAGGGCTAGAATTCACCTCCTATATC |
| RcPCP1_CDS_F | CCCTCGAGGGATGTGTTCAAGAGGTCATTGG |
| RcPCP1_CDS_R | CCCTCGAGGGTTAAATGCCCCCATTAACAGC |

---



**Supplementary reference:**

1. Zimmermann, I. M. et al. Comprehensive identification of *Arabidopsis thaliana* MYB transcription factors interacting with R/B-like BHLH proteins. *Plant J.* **40**, 22–34 (2004).
2. Stracke, R. et al. The *R2R3-MYB* gene family in *Arabidopsis thaliana*. *Curr. Opin. Plant Biol.* **4**, 447–456 (2001).
